# Supplementary material for: Compilation of Henry's law constants (version 5.0.0) for water as solvent
Source: Copernicus journal article supplement (doi:10.5194/acp-23-10901-2023), 2023-10-06
Supplement: Supplementary file 1 [file acp-23-10901-2023-supplement.zip]

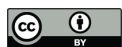

## *Supplement of*

# **Compilation of Henry's law constants (version 5.0.0) for water as solvent**

**Rolf Sander**

*Correspondence to:* Rolf Sander (rolf.sander@mpic.de)

- acp-23-10901-2023-supplement-title-page.pdf
- MANIFEST
- Makefile
- README
- henry.bib
- henry.f90
- henry.nml
- henry\_main.f90
- henry\_mem.f90
- henry\_psql.f90
- henry\_ref0500.f90
- henry\_ref1000.f90
- henry\_ref1500.f90
- henry\_ref2000.f90
- henry\_ref2500.f90
- henry\_ref3000.f90
- henry\_ref3500.f90
- henry\_ref4000.f90
- henry\_util.f90
- input
  - README

- ref0190.dat
- ref0379-10035-10-6-ABC.dat
- ref0379-10043-92-2-ABC.dat
- ref0379-10102-43-9-ABC.dat
- ref0379-124-38-9-ABC.dat
- ref0379-1333-74-0-ABC.dat
- ref0379-630-08-0-ABC.dat
- ref0379-74-82-8-ABC.dat
- ref0379-74-84-0-ABC.dat
- ref0379-74-85-1-ABC.dat
- ref0379-74-86-2-ABC.dat
- ref0379-7439-90-9-ABC.dat
- ref0379-7440-01-9-ABC.dat
- ref0379-7440-37-1-ABC.dat
- ref0379-7440-59-7-ABC.dat
- ref0379-7440-63-3-ABC.dat
- ref0379-7446-09-5-ABC.dat
- ref0379-7647-01-0-ABC.dat
- ref0379-7664-41-7-ABC.dat
- ref0379-7726-95-6-ABC.dat
- ref0379-7727-37-9-ABC.dat
- ref0379-7782-44-7-ABC.dat
- ref0379-7782-50-5-ABC.dat
- ref0379-7783-06-4-ABC.dat
- ref0477-10024-97-2-ABC.dat
- ref0477-10043-92-2-ABC.dat
- ref0477-10049-04-4-ABC.dat
- ref0477-10102-43-9-ABC.dat
- ref0477-106-97-8-ABC.dat
- ref0477-1333-74-0-ABC.dat
- ref0477-630-08-0-ABC.dat
- ref0477-74-82-8-ABC.dat
- ref0477-74-84-0-ABC.dat
- ref0477-74-98-6-ABC.dat
- ref0477-7439-90-9-ABC.dat
- ref0477-7440-01-9-ABC.dat
- ref0477-7440-37-1-ABC.dat
- ref0477-7440-59-7-ABC.dat
- ref0477-7440-63-3-ABC.dat
- ref0477-7446-09-5-ABC.dat
- ref0477-75-28-5-ABC.dat
- ref0477-7727-37-9-ABC.dat

- ref0477-7782-39-0-ABC.dat
- ref0477-7782-44-7-ABC.dat
- ref0477-7782-50-5-ABC.dat
- ref0477-7783-06-4-ABC.dat
- ref0477-7783-07-5-ABC.dat
- ref0477-7791-21-1-ABC.dat
- ref0479.dat
- ref0491-7782-44-7-ABC.dat
- ref0525-7782-44-7-ABC.dat
- ref0545.dat
- ref0583-124-48-1-ABC.dat
- ref0583-593-71-5-ABC.dat
- ref0583-67-66-3-ABC.dat
- ref0583-74-88-4-ABC.dat
- ref0583-74-95-3-ABC.dat
- ref0583-75-11-6-ABC.dat
- ref0583-75-25-2-ABC.dat
- ref0583-75-27-4-ABC.dat
- ref0599-100-41-4-ABC.dat
- ref0599-108-88-3-ABC.dat
- ref0599-127-18-4-ABC.dat
- ref0599-1634-04-4-ABC.dat
- ref0599-71-43-2-ABC.dat
- ref0599-71-55-6-ABC.dat
- ref0599-79-01-6-ABC.dat
- ref0599-95-47-6-ABC.dat
- ref0642.dat
- ref0732-10102-43-9-ABC.dat
- ref0747
  - \* 747all13.dat
  - \* 747all7b.dat
  - \* 747all7h.dat
  - \* 747all8b.dat
  - \* 747all8h.dat
  - \* 747ash6b.dat
  - \* 747ash6h.dat
  - \* 747bis6b.dat
  - \* 747bis6h.dat
  - \* 747bn10b.dat
  - \* 747bn10h.dat
  - \* 747bu12b.dat
  - \* 747bu12h.dat
  - \* 747co10b.dat
  - \* 747co10h.dat

- \* 747erv6b.dat
- \* 747erv6h.dat
- \* 747es11b.dat
- \* 747es11h.dat
- \* 747ex10b.dat
- \* 747ex10h.dat
- \* 747ex11h.dat
- \* 747ex12b.dat
- \* 747ex12h.dat
- \* 747fit6b.dat
- \* 747fit6h.dat
- \* 747g5a6b.dat
- \* 747g5a6h.dat
- \* 747g5b6b.dat
- \* 747g5b6h.dat
- \* 747go76b.dat
- \* 747go76h.dat
- \* 747han6b.dat
- \* 747han6h.dat
- \* 747hun6b.dat
- \* 747hun6h.dat
- \* 747jq10b.dat
- \* 747jq10h.dat
- \* 747kt12b.dat
- \* 747kt12h.dat
- \* 747lar6b.dat
- \* 747lar6h.dat
- \* 747lei6b.dat
- \* 747lei6h.dat
- \* 747mun6b.dat
- \* 747mun6h.dat
- \* 747nic6b.dat
- \* 747nic6h.dat
- \* 747rob6b.dat
- \* 747rob6h.dat
- \* 747sd10b.dat
- \* 747sd10h.dat
- \* 747tan6b.dat
- \* 747tan6h.dat
- \* 747ts10b.dat
- \* 747ts10h.dat
- \* 747us12b.dat
- \* 747us12h.dat
- \* 747wr10b.dat
- \* 747wr10h.dat
- ref0764-7439-90-9-ABC.dat
- ref0764-7440-01-9-ABC.dat

- ref0764-7440-37-1-ABC.dat
- ref0764-7440-59-7-ABC.dat
- ref0764-7440-63-3-ABC.dat
- ref0764-75-73-0-ABC.dat
- ref0789.dat
- ref0855-107-06-2-ABC.dat
- ref0855-156-59-2-ABC.dat
- ref0855-156-60-5-ABC.dat
- ref0855-542-75-6-ABC.dat
- ref0855-56-23-5-ABC.dat
- ref0855-630-20-6-ABC.dat
- ref0855-67-66-3-ABC.dat
- ref0855-71-55-6-ABC.dat
- ref0855-74-95-3-ABC.dat
- ref0855-75-09-2-ABC.dat
- ref0855-75-25-2-ABC.dat
- ref0855-75-34-3-ABC.dat
- ref0855-78-87-5-ABC.dat
- ref0855-79-00-5-ABC.dat
- ref0855-79-01-6-ABC.dat
- ref0855-79-34-5-ABC.dat
- ref0921-124-38-9-ABC.dat
- ref0921-75-37-6-ABC.dat
- ref0921-75-45-6-ABC.dat
- ref0921-75-46-7-ABC.dat
- ref0921-811-97-2-ABC.dat
- ref0923-115-07-1-ABC.dat
- ref0923-116-15-4-ABC.dat
- ref0923-1717-00-6-ABC.dat
- ref0923-2837-89-0-ABC.dat
- ref0923-359-10-4-ABC.dat
- ref0923-74-85-1-ABC.dat
- ref0923-75-00-3-ABC.dat
- ref0923-75-10-5-ABC.dat
- ref0923-75-37-6-ABC.dat
- ref0923-75-45-6-ABC.dat
- ref0923-75-46-7-ABC.dat
- ref0923-75-68-3-ABC.dat
- ref0923-75-69-4-ABC.dat
- ref0923-75-88-7-ABC.dat
- ref0923-811-97-2-ABC.dat
- ref0923.dat

- ref1014-75-45-6-ABC.dat
- ref1148-108-90-7-ABC.dat
- ref1148-156-60-5-ABC.dat
- ref1148-71-43-2-ABC.dat
- ref1148-79-01-6-ABC.dat
- ref1775-76-13-1-ABC.dat
- ref1776-2551-62-4-ABC.dat
- ref1911-630-08-0-ABC.dat
- ref2013-115-07-1-ABC.dat
- ref2013-2837-89-0-ABC.dat
- ref2013-354-33-6-ABC.dat
- ref2013-359-10-4-ABC.dat
- ref2013-431-89-0-ABC.dat
- ref2013-74-82-8-ABC.dat
- ref2013-74-84-0-ABC.dat
- ref2013-74-85-1-ABC.dat
- ref2013-74-87-3-ABC.dat
- ref2013-74-98-6-ABC.dat
- ref2013-75-00-3-ABC.dat
- ref2013-75-10-5-ABC.dat
- ref2013-75-37-6-ABC.dat
- ref2013-75-45-6-ABC.dat
- ref2013-75-68-3-ABC.dat
- ref2013-75-69-4-ABC.dat
- ref2013-75-71-8-ABC.dat
- ref2013-75-72-9-ABC.dat
- ref2013-75-73-0-ABC.dat
- ref2013-75-88-7-ABC.dat
- ref2013-76-13-1-ABC.dat
- ref2013-76-14-2-ABC.dat
- ref2013-76-15-3-ABC.dat
- ref2013-811-97-2-ABC.dat
- ref2121-306-83-2-ABC.dat
- ref2121-75-45-6-ABC.dat
- ref2121-75-68-3-ABC.dat
- ref2121-811-97-2-ABC.dat
- ref2122-2162-99-4-ABC.dat
- ref2122-4549-32-0-ABC.dat
- ref2222-593-53-3-ABC.dat
- ref2222-74-83-9-ABC.dat
- ref2222-74-87-3-ABC.dat
- ref2222-74-88-4-ABC.dat

- ref2323.dat
- ref2434-7727-37-9-ABC.dat
- ref2435-7440-37-1-ABC.dat
- ref2440.dat
- ref2445-76-38-0-ABC.dat
- ref2447-115-25-3-ABC.dat
- ref2447-428-59-1-ABC.dat
- ref2484-115-25-3-ABC.dat
- ref2484-75-73-0-ABC.dat
- ref2484-76-16-4-ABC.dat
- ref2485-115-25-3-ABC.dat
- ref2485-75-71-8-ABC.dat
- ref2485-75-72-9-ABC.dat
- ref2485-75-73-0-ABC.dat
- ref2535.dat
- ref2546.dat
- ref2831-2551-62-4-ABC.dat
- ref2831-7440-37-1-ABC.dat
- ref2831-75-73-0-ABC.dat
- ref2831-7783-54-2-ABC.dat
- ref2832-10024-97-2-ABC.dat
- ref2834-10102-43-9-ABC.dat
- ref2834-630-08-0-ABC.dat
- ref2834-74-82-8-ABC.dat
- ref2834-74-84-0-ABC.dat
- ref2841-124-38-9-ABC.dat
- ref2910-109-66-0-ABC.dat
- ref2931-108-90-7-ABC.dat
- ref2931-156-60-5-ABC.dat
- ref2931-71-43-2-ABC.dat
- ref2931-79-01-6-ABC.dat
- ref2936-1678-91-7-ABC.dat
- ref2936-2207-01-4-ABC.dat
- ref2936-292-64-8-ABC.dat
- ref2936-590-73-8-ABC.dat
- ref2936-592-13-2-ABC.dat
- ref2936-6876-23-9-ABC.dat
- ref2936-931-88-4-ABC.dat
- ref2953-108-88-3-ABC.dat
- ref2953-67-66-3-ABC.dat
- ref2953-71-43-2-ABC.dat
- ref2953-75-34-3-ABC.dat

- ref2953-79-01-6-ABC.dat
- ref3013-2043-47-2-ABC.dat
- ref3013-647-42-7-ABC.dat
- ref3013-678-39-7-ABC.dat
- ref3013-865-86-1-ABC.dat
- ref3026-1333-74-0-ABC.dat
- ref3027-7727-37-9-ABC.dat
- ref3027-7782-44-7-ABC.dat
- ref3215-108-64-5-ABC.dat
- ref3215-13925-07-0-ABC.dat
- ref3215-23726-93-4-ABC.dat
- ref3215-431-03-8-ABC.dat
- ref3215-534-22-5-ABC.dat
- ref3215-590-86-3-ABC.dat
- ref3215-75-07-0-ABC.dat
- ref3215-90-05-1-ABC.dat
- ref3304-107-03-9-ABC.dat
- ref3304-109-79-5-ABC.dat
- ref3304-110-02-1-ABC.dat
- ref3304-1634-04-4-ABC.dat
- ref3304-187103-12-4-ABC.dat
- ref3304-637-92-3-ABC.dat
- ref3304-75-33-2-ABC.dat
- ref3304-76589-16-7-ABC.dat
- ref3304-919-94-8-ABC.dat
- ref3304-994-05-8-ABC.dat
- ref3306-513-44-0-ABC.dat
- ref3306-75-33-2-ABC.dat
- ref3399.dat
- ref3406.dat
- ref3409.dat
- ref3412-7782-44-7-ABC.dat
- ref3414-10028-15-6-ABC.dat
- ref3529-630-08-0-ABC.dat
- ref3545-10043-92-2-ABC.dat
- ref3565-7727-37-9-ABC.dat
- ref3566-7782-44-7-ABC.dat
- ref3567-7440-37-1-ABC.dat
- ref3568-124-38-9-ABC.dat
- ref3569-74-82-8-ABC.dat
- ref3569-75-71-8-ABC.dat
- ref3569-75-72-9-ABC.dat



- ref3569-75-73-0-ABC.dat
- ref3571-56-23-5-ABC.dat
- ref3573-74-83-9-ABC.dat
- ref3579.dat
- ref3586.dat
- ref3603-7782-44-7-ABC.dat
- ref3605-7782-44-7-ABC.dat
- ref3606-7782-44-7-ABC.dat
- ref3612-106-98-9-ABC.dat
- ref3681-100-41-4-ABC.dat
- ref3681-106-42-3-ABC.dat
- ref3681-108-90-7-ABC.dat
- ref3681-127-18-4-ABC.dat
- ref3681-156-60-5-ABC.dat
- ref3681-630-20-6-ABC.dat
- ref3681-75-01-4-ABC.dat
- ref3681-75-35-4-ABC.dat
- ref3681-79-00-5-ABC.dat
- ref3681-79-01-6-ABC.dat
- ref3692-127-18-4-ABC.dat
- ref3692-79-01-6-ABC.dat
- ref3730.dat
- ref3764.dat
- ref3766.dat
- ref3781-1333-74-0-ABC.dat
- ref3782-1333-74-0-ABC.dat
- ref3783-106-97-8-ABC.dat
- ref3783-124-38-9-ABC.dat
- ref3783-1333-74-0-ABC.dat
- ref3783-74-82-8-ABC.dat
- ref3783-74-84-0-ABC.dat
- ref3783-74-85-1-ABC.dat
- ref3783-74-98-6-ABC.dat
- ref3783-7727-37-9-ABC.dat
- ref3783-7782-44-7-ABC.dat
- ref3785-463-82-1-ABC.dat
- ref3785-74-82-8-ABC.dat
- ref3785-7440-37-1-ABC.dat
- ref3785-7782-44-7-ABC.dat
- ref3789-7440-01-9-ABC.dat
- ref3789-7440-37-1-ABC.dat
- ref3789-7440-59-7-ABC.dat

- ref3795-1333-74-0-ABC.dat
- ref3795-7727-37-9-ABC.dat
- ref3806-10036-47-2-ABC.dat
- ref3806-7783-54-2-ABC.dat
- ref3808-7783-07-5-ABC.dat
- ref3857-7782-50-5-ABC.dat
- ref3917-13536-94-2-ABC.dat
- ref3917-7783-06-4-ABC.dat
- ref3925-7782-50-5-ABC.dat
- ref3926-7782-39-0-ABC.dat
- ref3933-7446-09-5-ABC.dat
- ref3933-7783-06-4-ABC.dat
- ref3937-7782-50-5-ABC.dat
- ref3944-10024-97-2-ABC.dat
- refthis-7791-21-1-ABC.dat

- output

- Hsbp.f90
- HsbpSI.f90
- Hscc.f90
- Hscp.f90
- HscpSI.f90
- Hsxp.f90
- Hvcc.f90
- Hvpc.f90
- HvpcSI.f90
- Hvpx.f90
- alpha.f90
- gnuplot
  - \* Tdep.pdf
  - \* ref0043-7722-84-1.gnu
  - \* ref0074-7782-77-6.gnu
  - \* ref0088-12033-49-7.gnu
  - \* ref0183-7790-92-3.gnu
  - \* ref0276-13517-11-8.gnu
  - \* ref0287-10025-85-1.gnu
  - \* ref0287-10599-90-3.gnu
  - \* ref0287-3400-09-7.gnu
  - \* ref0287-7790-92-3.gnu
  - \* ref0379-10024-97-2.gnu
  - \* ref0379-10035-10-6-ABC.gnu
  - \* ref0379-10043-92-2-ABC.gnu
  - \* ref0379-10102-43-9-ABC.gnu
  - \* ref0379-124-38-9-ABC.gnu

- \* ref0379-1333-74-0-ABC.gnu
- \* ref0379-630-08-0-ABC.gnu
- \* ref0379-74-82-8-ABC.gnu
- \* ref0379-74-84-0-ABC.gnu
- \* ref0379-74-85-1-ABC.gnu
- \* ref0379-74-86-2-ABC.gnu
- \* ref0379-7439-90-9-ABC.gnu
- \* ref0379-7440-01-9-ABC.gnu
- \* ref0379-7440-37-1-ABC.gnu
- \* ref0379-7440-59-7-ABC.gnu
- \* ref0379-7440-63-3-ABC.gnu
- \* ref0379-7446-09-5-ABC.gnu
- \* ref0379-7647-01-0-ABC.gnu
- \* ref0379-7664-41-7-ABC.gnu
- \* ref0379-7726-95-6-ABC.gnu
- \* ref0379-7727-37-9-ABC.gnu
- \* ref0379-7782-44-7-ABC.gnu
- \* ref0379-7783-06-4-ABC.gnu
- \* ref0483-107-02-8.gnu
- \* ref0483-64-17-5.gnu
- \* ref0483-67-56-1.gnu
- \* ref0483-67-63-0.gnu
- \* ref0483-67-64-1.gnu
- \* ref0483-71-23-8.gnu
- \* ref0483-71-36-3.gnu
- \* ref0483-75-05-8.gnu
- \* ref0483-75-07-0.gnu
- \* ref0483-75-65-0.gnu
- \* ref0483-78-92-2.gnu
- \* ref0483-78-93-3.gnu
- \* ref0484-100-52-7.gnu
- \* ref0484-141-46-8.gnu
- \* ref0484-50-00-0.gnu
- \* ref0484-75-07-0.gnu
- \* ref0484-75-87-6.gnu
- \* ref0484-78-98-8.gnu
- \* ref0491-7782-44-7-ABC.gnu
- \* ref0514-10102-03-1.gnu
- \* ref0515-3170-83-0.gnu
- \* ref0515-3352-57-6.gnu
- \* ref0525-7782-44-7-ABC.gnu
- \* ref0528-10028-15-6.gnu
- \* ref0533-924-52-7.gnu
- \* ref0533-928-45-0.gnu
- \* ref0583-124-48-1-ABC.gnu
- \* ref0583-593-71-5-ABC.gnu
- \* ref0583-67-66-3-ABC.gnu

- \* ref0583-74-87-3.gnu
- \* ref0583-74-88-4-ABC.gnu
- \* ref0583-74-95-3-ABC.gnu
- \* ref0583-75-11-6-ABC.gnu
- \* ref0583-75-25-2-ABC.gnu
- \* ref0583-75-27-4-ABC.gnu
- \* ref0599-100-41-4-ABC.gnu
- \* ref0599-108-88-3-ABC.gnu
- \* ref0599-127-18-4-ABC.gnu
- \* ref0599-1634-04-4-ABC.gnu
- \* ref0599-71-43-2-ABC.gnu
- \* ref0599-71-55-6-ABC.gnu
- \* ref0599-79-01-6-ABC.gnu
- \* ref0599-95-47-6-ABC.gnu
- \* ref0630-100-52-7.gnu
- \* ref0630-110-62-3.gnu
- \* ref0630-111-71-7.gnu
- \* ref0630-112-31-2.gnu
- \* ref0630-123-38-6.gnu
- \* ref0630-123-72-8.gnu
- \* ref0630-124-13-0.gnu
- \* ref0630-124-19-6.gnu
- \* ref0630-50-00-0.gnu
- \* ref0630-66-25-1.gnu
- \* ref0630-67-64-1.gnu
- \* ref0630-75-07-0.gnu
- \* ref0630-78-93-3.gnu
- \* ref0727-374-01-6.gnu
- \* ref0727-422-05-9.gnu
- \* ref0727-75-89-8.gnu
- \* ref0727-76-37-9.gnu
- \* ref0727-920-66-1.gnu
- \* ref0732-10102-43-9-ABC.gnu
- \* ref0753-7726-95-6.gnu
- \* ref0759-13863-41-7.gnu
- \* ref0759-7726-95-6.gnu
- \* ref0764-7439-90-9-ABC.gnu
- \* ref0764-7440-01-9-ABC.gnu
- \* ref0764-7440-37-1-ABC.gnu
- \* ref0764-7440-59-7-ABC.gnu
- \* ref0764-7440-63-3-ABC.gnu
- \* ref0764-75-73-0-ABC.gnu
- \* ref0791-106-42-3.gnu
- \* ref0791-1076-43-3.gnu
- \* ref0791-108-88-3.gnu
- \* ref0791-71-43-2.gnu
- \* ref0791-95-47-6.gnu

- \* ref0800-15932-89-5.gnu
- \* ref0800-17088-73-2.gnu
- \* ref0800-7722-84-1.gnu
- \* ref0821-7446-09-5.gnu
- \* ref0824-67-68-5.gnu
- \* ref0855-107-06-2-ABC.gnu
- \* ref0855-156-59-2-ABC.gnu
- \* ref0855-156-60-5-ABC.gnu
- \* ref0855-542-75-6-ABC.gnu
- \* ref0855-56-23-5-ABC.gnu
- \* ref0855-630-20-6-ABC.gnu
- \* ref0855-67-66-3-ABC.gnu
- \* ref0855-71-55-6-ABC.gnu
- \* ref0855-74-95-3-ABC.gnu
- \* ref0855-75-09-2-ABC.gnu
- \* ref0855-75-25-2-ABC.gnu
- \* ref0855-75-34-3-ABC.gnu
- \* ref0855-78-87-5-ABC.gnu
- \* ref0855-79-00-5-ABC.gnu
- \* ref0855-79-01-6-ABC.gnu
- \* ref0855-79-34-5-ABC.gnu
- \* ref0856-107-06-2.gnu
- \* ref0856-124-48-1.gnu
- \* ref0856-156-59-2.gnu
- \* ref0856-156-60-5.gnu
- \* ref0856-56-23-5.gnu
- \* ref0856-630-20-6.gnu
- \* ref0856-71-55-6.gnu
- \* ref0856-74-95-3.gnu
- \* ref0856-75-09-2.gnu
- \* ref0856-75-25-2.gnu
- \* ref0856-75-27-4.gnu
- \* ref0856-75-34-3.gnu
- \* ref0856-75-35-4.gnu
- \* ref0856-78-87-5.gnu
- \* ref0856-79-00-5.gnu
- \* ref0856-79-01-6.gnu
- \* ref0856-79-34-5.gnu
- \* ref0857-108-10-1.gnu
- \* ref0857-108-88-3.gnu
- \* ref0857-110-54-3.gnu
- \* ref0857-110-82-7.gnu
- \* ref0857-123-86-4.gnu
- \* ref0857-123-91-1.gnu
- \* ref0857-127-18-4.gnu
- \* ref0857-141-78-6.gnu
- \* ref0857-67-63-0.gnu

- \* ref0857-71-36-3.gnu
- \* ref0857-71-55-6.gnu
- \* ref0857-95-47-6.gnu
- \* ref0858-108-88-3.gnu
- \* ref0858-108-90-7.gnu
- \* ref0858-71-43-2.gnu
- \* ref0858-78-93-3.gnu
- \* ref0862-463-58-1.gnu
- \* ref0862-67-66-3.gnu
- \* ref0862-74-85-1.gnu
- \* ref0862-74-86-2.gnu
- \* ref0862-7440-37-1.gnu
- \* ref0862-75-15-0.gnu
- \* ref0862-7726-95-6.gnu
- \* ref0862-7783-06-4.gnu
- \* ref0863-106-94-5.gnu
- \* ref0863-107-06-2.gnu
- \* ref0863-107-08-4.gnu
- \* ref0863-540-54-5.gnu
- \* ref0863-56-23-5.gnu
- \* ref0863-67-66-3.gnu
- \* ref0863-74-88-4.gnu
- \* ref0863-74-95-3.gnu
- \* ref0863-74-96-4.gnu
- \* ref0863-75-03-6.gnu
- \* ref0863-75-09-2.gnu
- \* ref0863-75-15-0.gnu
- \* ref0863-75-26-3.gnu
- \* ref0863-75-29-6.gnu
- \* ref0863-75-30-9.gnu
- \* ref0863-75-34-3.gnu
- \* ref0871-7726-95-6.gnu
- \* ref0903-106-42-3.gnu
- \* ref0903-108-86-1.gnu
- \* ref0903-108-87-2.gnu
- \* ref0903-111-65-9.gnu
- \* ref0903-118-74-1.gnu
- \* ref0903-142-82-5.gnu
- \* ref0903-156-60-5.gnu
- \* ref0903-287-92-3.gnu
- \* ref0903-56-23-5.gnu
- \* ref0903-591-76-4.gnu
- \* ref0903-71-55-6.gnu
- \* ref0903-79-00-5.gnu
- \* ref0903-91-57-6.gnu
- \* ref0903-95-63-6.gnu
- \* ref0903-98-82-8.gnu

- \* ref0921-124-38-9-ABC.gnu
- \* ref0921-75-37-6-ABC.gnu
- \* ref0921-75-45-6-ABC.gnu
- \* ref0921-75-46-7-ABC.gnu
- \* ref0921-811-97-2-ABC.gnu
- \* ref0923-115-07-1-ABC.gnu
- \* ref0923-116-15-4-ABC.gnu
- \* ref0923-1717-00-6-ABC.gnu
- \* ref0923-2837-89-0-ABC.gnu
- \* ref0923-359-10-4-ABC.gnu
- \* ref0923-74-85-1-ABC.gnu
- \* ref0923-75-00-3-ABC.gnu
- \* ref0923-75-10-5-ABC.gnu
- \* ref0923-75-37-6-ABC.gnu
- \* ref0923-75-45-6-ABC.gnu
- \* ref0923-75-46-7-ABC.gnu
- \* ref0923-75-68-3-ABC.gnu
- \* ref0923-75-69-4-ABC.gnu
- \* ref0923-75-88-7-ABC.gnu
- \* ref0923-811-97-2-ABC.gnu
- \* ref0983-75-18-3.gnu
- \* ref0985-100-52-7.gnu
- \* ref0985-78-85-3.gnu
- \* ref0985-78-94-4.gnu
- \* ref0985-98-86-2.gnu
- \* ref1014-75-45-6-ABC.gnu
- \* ref1026-127-18-4.gnu
- \* ref1026-67-66-3.gnu
- \* ref1026-74-87-3.gnu
- \* ref1026-75-09-2.gnu
- \* ref1026-79-01-6.gnu
- \* ref1072-7446-09-5.gnu
- \* ref1125-75-44-5.gnu
- \* ref1138-10102-43-9.gnu
- \* ref1138-10544-72-6.gnu
- \* ref1138-7782-77-6.gnu
- \* ref1146-118-74-1.gnu
- \* ref1146-191-24-2.gnu
- \* ref1146-193-39-5.gnu
- \* ref1146-205-99-2.gnu
- \* ref1146-206-44-0.gnu
- \* ref1146-207-08-9.gnu
- \* ref1146-34883-39-1.gnu
- \* ref1146-35693-99-3.gnu
- \* ref1146-50-32-8.gnu
- \* ref1146-608-93-5.gnu
- \* ref1146-634-66-2.gnu

- \* ref1146-7012-37-5.gnu
- \* ref1148-108-90-7-ABC.gnu
- \* ref1148-156-60-5-ABC.gnu
- \* ref1148-71-43-2-ABC.gnu
- \* ref1148-79-01-6-ABC.gnu
- \* ref1149-7553-56-2.gnu
- \* ref1156-100-41-4.gnu
- \* ref1156-103-65-1.gnu
- \* ref1156-105-67-9.gnu
- \* ref1156-106-42-3.gnu
- \* ref1156-106-46-7.gnu
- \* ref1156-106-93-4.gnu
- \* ref1156-107-06-2.gnu
- \* ref1156-107-83-5.gnu
- \* ref1156-108-10-1.gnu
- \* ref1156-108-38-3.gnu
- \* ref1156-108-67-8.gnu
- \* ref1156-108-88-3.gnu
- \* ref1156-108-90-7.gnu
- \* ref1156-109-86-4.gnu
- \* ref1156-110-54-3.gnu
- \* ref1156-110-82-7.gnu
- \* ref1156-111-84-2.gnu
- \* ref1156-119-64-2.gnu
- \* ref1156-120-82-1.gnu
- \* ref1156-124-48-1.gnu
- \* ref1156-127-18-4.gnu
- \* ref1156-156-59-2.gnu
- \* ref1156-156-60-5.gnu
- \* ref1156-541-73-1.gnu
- \* ref1156-56-23-5.gnu
- \* ref1156-67-66-3.gnu
- \* ref1156-67-72-1.gnu
- \* ref1156-71-43-2.gnu
- \* ref1156-71-55-6.gnu
- \* ref1156-75-00-3.gnu
- \* ref1156-75-01-4.gnu
- \* ref1156-75-09-2.gnu
- \* ref1156-75-34-3.gnu
- \* ref1156-75-35-4.gnu
- \* ref1156-75-69-4.gnu
- \* ref1156-76-13-1.gnu
- \* ref1156-78-87-5.gnu
- \* ref1156-78-93-3.gnu
- \* ref1156-79-00-5.gnu
- \* ref1156-79-01-6.gnu
- \* ref1156-79-34-5.gnu



- \* ref1156-91-17-8.gnu
- \* ref1156-95-47-6.gnu
- \* ref1156-95-50-1.gnu
- \* ref1156-98-82-8.gnu
- \* ref1229-100-41-4.gnu
- \* ref1229-103-65-1.gnu
- \* ref1229-104-51-8.gnu
- \* ref1229-108-88-3.gnu
- \* ref1229-71-43-2.gnu
- \* ref1230-7782-50-5.gnu
- \* ref1331-108-88-3.gnu
- \* ref1331-1194-65-6.gnu
- \* ref1331-67-64-1.gnu
- \* ref1331-79-01-6.gnu
- \* ref1342-74-83-9.gnu
- \* ref1342-74-87-3.gnu
- \* ref1342-74-88-4.gnu
- \* ref1502-10102-44-0.gnu
- \* ref1773-75-18-3.gnu
- \* ref1775-76-13-1-ABC.gnu
- \* ref1776-2551-62-4-ABC.gnu
- \* ref1911-630-08-0-ABC.gnu
- \* ref1925-144-62-7.gnu
- \* ref1929-107-03-9.gnu
- \* ref1929-109-79-5.gnu
- \* ref1929-75-18-3.gnu
- \* ref1936-75-18-3.gnu
- \* ref1940-106-65-0.gnu
- \* ref1940-108-59-8.gnu
- \* ref1942-140-66-9.gnu
- \* ref1942-58-89-9.gnu
- \* ref1942-RYIHVIPUIXFRNI-IUODEOHRSA-N.gnu
- \* ref1942-RYIHVIPUIXFRNI-SWLSCSKDSA-N.gnu
- \* ref1943-75-03-6.gnu
- \* ref1943-7553-56-2.gnu
- \* ref1943-7726-95-6.gnu
- \* ref1992-75-44-5.gnu
- \* ref1996-108-03-2.gnu
- \* ref1996-75-52-5.gnu
- \* ref1996-79-24-3.gnu
- \* ref1996-79-46-9.gnu
- \* ref2013-115-07-1-ABC.gnu
- \* ref2013-2837-89-0-ABC.gnu
- \* ref2013-354-33-6-ABC.gnu
- \* ref2013-359-10-4-ABC.gnu
- \* ref2013-431-89-0-ABC.gnu
- \* ref2013-74-82-8-ABC.gnu

- \* ref2013-74-84-0-ABC.gnu
- \* ref2013-74-85-1-ABC.gnu
- \* ref2013-74-87-3-ABC.gnu
- \* ref2013-74-98-6-ABC.gnu
- \* ref2013-75-00-3-ABC.gnu
- \* ref2013-75-10-5-ABC.gnu
- \* ref2013-75-37-6-ABC.gnu
- \* ref2013-75-45-6-ABC.gnu
- \* ref2013-75-68-3-ABC.gnu
- \* ref2013-75-69-4-ABC.gnu
- \* ref2013-75-71-8-ABC.gnu
- \* ref2013-75-72-9-ABC.gnu
- \* ref2013-75-73-0-ABC.gnu
- \* ref2013-75-88-7-ABC.gnu
- \* ref2013-76-13-1-ABC.gnu
- \* ref2013-76-14-2-ABC.gnu
- \* ref2013-76-15-3-ABC.gnu
- \* ref2013-811-97-2-ABC.gnu
- \* ref2121-306-83-2-ABC.gnu
- \* ref2121-75-45-6-ABC.gnu
- \* ref2121-75-68-3-ABC.gnu
- \* ref2121-811-97-2-ABC.gnu
- \* ref2122-2162-99-4-ABC.gnu
- \* ref2122-4549-32-0-ABC.gnu
- \* ref2171-593-74-8.gnu
- \* ref2171-7439-97-6.gnu
- \* ref2203-2699-79-8.gnu
- \* ref2216-319-84-6.gnu
- \* ref2216-319-85-7.gnu
- \* ref2216-58-89-9.gnu
- \* ref2222-593-53-3-ABC.gnu
- \* ref2222-74-83-9-ABC.gnu
- \* ref2222-74-87-3-ABC.gnu
- \* ref2222-74-88-4-ABC.gnu
- \* ref2288-115-09-3.gnu
- \* ref2289-593-74-8.gnu
- \* ref2290-12135-13-6.gnu
- \* ref2290-7487-94-7.gnu
- \* ref2431-108-20-3.gnu
- \* ref2431-637-92-3.gnu
- \* ref2431-75-65-0.gnu
- \* ref2431-994-05-8.gnu
- \* ref2434-7727-37-9-ABC.gnu
- \* ref2435-7440-37-1-ABC.gnu
- \* ref2445-151-67-7.gnu
- \* ref2445-26675-46-7.gnu
- \* ref2445-406-90-6.gnu

- \* ref2445-76-38-0-ABC.gnu
- \* ref2447-115-25-3-ABC.gnu
- \* ref2447-428-59-1-ABC.gnu
- \* ref2451-106-48-9.gnu
- \* ref2451-108-43-0.gnu
- \* ref2451-108-95-2.gnu
- \* ref2451-120-83-2.gnu
- \* ref2451-95-57-8.gnu
- \* ref2453-100-41-4.gnu
- \* ref2453-103-65-1.gnu
- \* ref2453-106-42-3.gnu
- \* ref2453-108-38-3.gnu
- \* ref2453-108-67-8.gnu
- \* ref2453-108-88-3.gnu
- \* ref2453-526-73-8.gnu
- \* ref2453-71-43-2.gnu
- \* ref2453-95-47-6.gnu
- \* ref2453-95-63-6.gnu
- \* ref2453-98-82-8.gnu
- \* ref2458-1127-76-0.gnu
- \* ref2458-90-12-0.gnu
- \* ref2458-91-20-3.gnu
- \* ref2463-108-88-3.gnu
- \* ref2463-67-66-3.gnu
- \* ref2463-71-43-2.gnu
- \* ref2464-138-86-3.gnu
- \* ref2464-586-62-9.gnu
- \* ref2464-7070-15-7.gnu
- \* ref2464-72402-00-7.gnu
- \* ref2464-78-70-6.gnu
- \* ref2464-80-56-8.gnu
- \* ref2464-98-55-5.gnu
- \* ref2464-99-85-4.gnu
- \* ref2471-71-43-2.gnu
- \* ref2477-120-12-7.gnu
- \* ref2477-129-00-0.gnu
- \* ref2477-206-44-0.gnu
- \* ref2477-208-96-8.gnu
- \* ref2477-218-01-9.gnu
- \* ref2477-238-84-6.gnu
- \* ref2477-56-55-3.gnu
- \* ref2477-83-32-9.gnu
- \* ref2477-832-69-9.gnu
- \* ref2477-85-01-8.gnu
- \* ref2477-86-73-7.gnu
- \* ref2477-90-12-0.gnu
- \* ref2477-91-57-6.gnu

- \* ref2484-115-25-3-ABC.gnu
- \* ref2484-75-73-0-ABC.gnu
- \* ref2484-76-16-4-ABC.gnu
- \* ref2484-76-19-7.gnu
- \* ref2485-115-25-3-ABC.gnu
- \* ref2485-75-71-8-ABC.gnu
- \* ref2485-75-72-9-ABC.gnu
- \* ref2485-75-73-0-ABC.gnu
- \* ref2489-120-12-7.gnu
- \* ref2489-129-00-0.gnu
- \* ref2489-776-35-2.gnu
- \* ref2496-101-55-3.gnu
- \* ref2496-189084-64-8.gnu
- \* ref2496-2050-47-7.gnu
- \* ref2496-2050-68-2.gnu
- \* ref2496-2051-60-7.gnu
- \* ref2496-2051-62-9.gnu
- \* ref2496-2437-79-8.gnu
- \* ref2496-31508-00-6.gnu
- \* ref2496-32598-13-3.gnu
- \* ref2496-34883-43-7.gnu
- \* ref2496-38380-01-7.gnu
- \* ref2496-41318-75-6.gnu
- \* ref2496-446254-77-9.gnu
- \* ref2496-5436-43-1.gnu
- \* ref2496-60348-60-9.gnu
- \* ref2496-7012-37-5.gnu
- \* ref2534-75-21-8.gnu
- \* ref2551-107-00-6.gnu
- \* ref2551-689-97-4.gnu
- \* ref2551-74-99-7.gnu
- \* ref2552-593-70-4.gnu
- \* ref2552-74-87-3.gnu
- \* ref2552-75-45-6.gnu
- \* ref2570-7487-94-7.gnu
- \* ref2576-1184-57-2.gnu
- \* ref2610-75-73-0.gnu
- \* ref2610-76-16-4.gnu
- \* ref2631-75-15-0.gnu
- \* ref2645-100-41-4.gnu
- \* ref2645-108-88-3.gnu
- \* ref2645-1634-04-4.gnu
- \* ref2645-637-92-3.gnu
- \* ref2645-71-43-2.gnu
- \* ref2645-95-47-6.gnu
- \* ref2647-1634-04-4.gnu
- \* ref2808-422-05-9.gnu

- \* ref2808-75-89-8.gnu
- \* ref2808-76-37-9.gnu
- \* ref2820-7439-97-6.gnu
- \* ref2825-107-87-9.gnu
- \* ref2825-110-43-0.gnu
- \* ref2825-591-78-6.gnu
- \* ref2825-67-64-1.gnu
- \* ref2825-78-93-3.gnu
- \* ref2830-75-69-4.gnu
- \* ref2830-75-71-8.gnu
- \* ref2831-2551-62-4-ABC.gnu
- \* ref2831-7440-37-1-ABC.gnu
- \* ref2831-75-73-0-ABC.gnu
- \* ref2831-7783-54-2-ABC.gnu
- \* ref2832-10024-97-2-ABC.gnu
- \* ref2834-10102-43-9-ABC.gnu
- \* ref2834-630-08-0-ABC.gnu
- \* ref2834-74-82-8-ABC.gnu
- \* ref2834-74-84-0-ABC.gnu
- \* ref2837-111-76-2.gnu
- \* ref2837-112-07-2.gnu
- \* ref2841-124-38-9-ABC.gnu
- \* ref2895-106-93-4.gnu
- \* ref2895-75-25-2.gnu
- \* ref2895-79-27-6.gnu
- \* ref2896-108-88-3.gnu
- \* ref2896-127-18-4.gnu
- \* ref2896-71-55-6.gnu
- \* ref2896-79-01-6.gnu
- \* ref2897-127-18-4.gnu
- \* ref2897-156-59-2.gnu
- \* ref2897-156-60-5.gnu
- \* ref2897-79-01-6.gnu
- \* ref2901-107-06-2.gnu
- \* ref2901-108-88-3.gnu
- \* ref2901-60-29-7.gnu
- \* ref2901-67-66-3.gnu
- \* ref2901-75-34-3.gnu
- \* ref2901-79-01-6.gnu
- \* ref2904-79-34-5.gnu
- \* ref2904-96-18-4.gnu
- \* ref2904-98-82-8.gnu
- \* ref2905-106-42-3.gnu
- \* ref2905-108-88-3.gnu
- \* ref2905-108-90-7.gnu
- \* ref2905-127-18-4.gnu
- \* ref2905-156-59-2.gnu

- \* ref2905-156-60-5.gnu
- \* ref2905-56-23-5.gnu
- \* ref2905-67-66-3.gnu
- \* ref2905-71-43-2.gnu
- \* ref2905-75-09-2.gnu
- \* ref2905-79-01-6.gnu
- \* ref2905-95-50-1.gnu
- \* ref2909-109-66-0.gnu
- \* ref2909-110-54-3.gnu
- \* ref2909-111-65-9.gnu
- \* ref2909-111-84-2.gnu
- \* ref2909-142-82-5.gnu
- \* ref2910-109-66-0-ABC.gnu
- \* ref2914-120-12-7.gnu
- \* ref2914-85-01-8.gnu
- \* ref2914-86-73-7.gnu
- \* ref2921-100-41-4.gnu
- \* ref2921-1634-04-4.gnu
- \* ref2921-71-43-2.gnu
- \* ref2921-79-01-6.gnu
- \* ref2921-95-47-6.gnu
- \* ref2922-108-38-3.gnu
- \* ref2922-108-88-3.gnu
- \* ref2922-71-43-2.gnu
- \* ref2926-100-66-3.gnu
- \* ref2926-106-38-7.gnu
- \* ref2926-367-11-3.gnu
- \* ref2926-87-61-6.gnu
- \* ref2926-95-73-8.gnu
- \* ref2928-7783-06-4.gnu
- \* ref2929-7783-06-4.gnu
- \* ref2931-108-90-7-ABC.gnu
- \* ref2931-156-60-5-ABC.gnu
- \* ref2931-71-43-2-ABC.gnu
- \* ref2931-79-01-6-ABC.gnu
- \* ref2936-1678-91-7-ABC.gnu
- \* ref2936-2207-01-4-ABC.gnu
- \* ref2936-292-64-8-ABC.gnu
- \* ref2936-590-73-8-ABC.gnu
- \* ref2936-592-13-2-ABC.gnu
- \* ref2936-6876-23-9-ABC.gnu
- \* ref2936-931-88-4-ABC.gnu
- \* ref2939-1717-00-6.gnu
- \* ref2939-2837-89-0.gnu
- \* ref2939-306-83-2.gnu
- \* ref2939-422-56-0.gnu
- \* ref2939-507-55-1.gnu

- \* ref2939-75-68-3.gnu
- \* ref2942-71-43-2.gnu
- \* ref2952-56-23-5.gnu
- \* ref2952-67-66-3.gnu
- \* ref2952-74-88-4.gnu
- \* ref2952-75-69-4.gnu
- \* ref2953-108-88-3-ABC.gnu
- \* ref2953-67-66-3-ABC.gnu
- \* ref2953-71-43-2-ABC.gnu
- \* ref2953-75-34-3-ABC.gnu
- \* ref2953-79-01-6-ABC.gnu
- \* ref2980-110-82-7.gnu
- \* ref2981-100-41-4.gnu
- \* ref2981-108-88-3.gnu
- \* ref2981-71-43-2.gnu
- \* ref2982-108-86-1.gnu
- \* ref2982-108-88-3.gnu
- \* ref2982-108-90-7.gnu
- \* ref2982-71-43-2.gnu
- \* ref2984-100-41-4.gnu
- \* ref2984-108-67-8.gnu
- \* ref2984-108-88-3.gnu
- \* ref2984-71-43-2.gnu
- \* ref2987-100-47-0.gnu
- \* ref2987-108-88-3.gnu
- \* ref2993-19430-93-4.gnu
- \* ref2993-2043-47-2.gnu
- \* ref2993-21652-58-4.gnu
- \* ref2993-25291-17-2.gnu
- \* ref2993-30389-25-4.gnu
- \* ref2993-647-42-7.gnu
- \* ref2993-678-39-7.gnu
- \* ref2993-865-86-1.gnu
- \* ref2996-108-88-3.gnu
- \* ref2996-108-90-7.gnu
- \* ref2996-2043-47-2.gnu
- \* ref2996-647-42-7.gnu
- \* ref2996-678-39-7.gnu
- \* ref2996-71-43-2.gnu
- \* ref2997-111-27-3.gnu
- \* ref2997-111-70-6.gnu
- \* ref2997-111-87-5.gnu
- \* ref2997-112-30-1.gnu
- \* ref2997-143-08-8.gnu
- \* ref2997-71-36-3.gnu
- \* ref2997-71-41-0.gnu
- \* ref2999-111-27-3.gnu

- \* ref2999-111-70-6.gnu
- \* ref2999-111-87-5.gnu
- \* ref2999-112-30-1.gnu
- \* ref2999-143-08-8.gnu
- \* ref2999-71-36-3.gnu
- \* ref2999-71-41-0.gnu
- \* ref3006-206-44-0.gnu
- \* ref3006-215-58-7.gnu
- \* ref3006-53-70-3.gnu
- \* ref3008-138-86-3.gnu
- \* ref3008-78-70-6.gnu
- \* ref3008-78-79-5.gnu
- \* ref3008-80-56-8.gnu
- \* ref3013-2043-47-2.gnu
- \* ref3013-647-42-7.gnu
- \* ref3013-678-39-7.gnu
- \* ref3013-865-86-1.gnu
- \* ref3015-10193-36-9.gnu
- \* ref3026-1333-74-0-ABC.gnu
- \* ref3027-7727-37-9-ABC.gnu
- \* ref3027-7782-44-7-ABC.gnu
- \* ref3033-7803-51-2.gnu
- \* ref3070-115-09-3.gnu
- \* ref3070-12135-13-6.gnu
- \* ref3070-593-74-8.gnu
- \* ref3070-7487-94-7.gnu
- \* ref3077-78-00-2.gnu
- \* ref3080-55-18-5.gnu
- \* ref3080-62-75-9.gnu
- \* ref3080-930-55-2.gnu
- \* ref3086-10061-01-5.gnu
- \* ref3086-10061-02-6.gnu
- \* ref3100-74-99-7.gnu
- \* ref3111-50-00-0.gnu
- \* ref3112-107-87-9.gnu
- \* ref3112-110-43-0.gnu
- \* ref3112-111-27-3.gnu
- \* ref3112-591-78-6.gnu
- \* ref3112-64-17-5.gnu
- \* ref3112-67-64-1.gnu
- \* ref3112-71-23-8.gnu
- \* ref3112-71-36-3.gnu
- \* ref3112-71-41-0.gnu
- \* ref3112-78-93-3.gnu
- \* ref3115-624-92-0.gnu
- \* ref3115-75-18-3.gnu
- \* ref3116-100-41-4.gnu



- \* ref3116-108-88-3.gnu
- \* ref3116-1634-04-4.gnu
- \* ref3116-637-92-3.gnu
- \* ref3116-95-47-6.gnu
- \* ref3117-75-28-5.gnu
- \* ref3118-174913-14-5.gnu
- \* ref3118-174913-18-9.gnu
- \* ref3118-174913-44-1.gnu
- \* ref3118-19240-91-6.gnu
- \* ref3118-50375-10-5.gnu
- \* ref3118-60633-26-3.gnu
- \* ref3118-607-99-8.gnu
- \* ref3118-87-40-1.gnu
- \* ref3118-95970-19-7.gnu
- \* ref3118-AHBGIHFKTBTQJP-UHFFFAOYSA-N.gnu
- \* ref3119-463-58-1.gnu
- \* ref3123-10544-72-6.gnu
- \* ref3126-74-82-8.gnu
- \* ref3132-67-56-1.gnu
- \* ref3214-547-64-8.gnu
- \* ref3215-108-64-5-ABC.gnu
- \* ref3215-13925-07-0-ABC.gnu
- \* ref3215-23726-93-4-ABC.gnu
- \* ref3215-431-03-8-ABC.gnu
- \* ref3215-534-22-5-ABC.gnu
- \* ref3215-590-86-3-ABC.gnu
- \* ref3215-75-07-0-ABC.gnu
- \* ref3215-90-05-1-ABC.gnu
- \* ref3261-354-33-6.gnu
- \* ref3261-75-10-5.gnu
- \* ref3261-75-46-7.gnu
- \* ref3262-75-10-5.gnu
- \* ref3303-19700-21-1.gnu
- \* ref3303-2371-42-8.gnu
- \* ref3303-557-48-2.gnu
- \* ref3304-107-03-9-ABC.gnu
- \* ref3304-109-79-5-ABC.gnu
- \* ref3304-110-02-1-ABC.gnu
- \* ref3304-1634-04-4-ABC.gnu
- \* ref3304-187103-12-4-ABC.gnu
- \* ref3304-637-92-3-ABC.gnu
- \* ref3304-75-33-2-ABC.gnu
- \* ref3304-76589-16-7-ABC.gnu
- \* ref3304-919-94-8-ABC.gnu
- \* ref3304-994-05-8-ABC.gnu
- \* ref3306-513-44-0-ABC.gnu
- \* ref3306-75-33-2-ABC.gnu

- \* ref3407-7727-37-9.gnu
- \* ref3412-7782-44-7-ABC.gnu
- \* ref3414-10028-15-6.gnu
- \* ref3506-53112-28-0.gnu
- \* ref3506-67306-00-7.gnu
- \* ref3508-590-86-3.gnu
- \* ref3508-624-92-0.gnu
- \* ref3508-66-25-1.gnu
- \* ref3508-75-18-3.gnu
- \* ref3508-78-84-2.gnu
- \* ref3517-10043-92-2.gnu
- \* ref3517-7439-90-9.gnu
- \* ref3517-7440-01-9.gnu
- \* ref3517-7440-37-1.gnu
- \* ref3517-7440-59-7.gnu
- \* ref3517-7440-63-3.gnu
- \* ref3525-75-13-8.gnu
- \* ref3526-64-17-5.gnu
- \* ref3526-67-56-1.gnu
- \* ref3526-67-64-1.gnu
- \* ref3528-74-86-2.gnu
- \* ref3529-630-08-0-ABC.gnu
- \* ref3534-7783-06-4.gnu
- \* ref3535-7782-50-5.gnu
- \* ref3541-7782-50-5.gnu
- \* ref3545-10043-92-2-ABC.gnu
- \* ref3546-10043-92-2.gnu
- \* ref3547-7440-37-1.gnu
- \* ref3548-7440-59-7.gnu
- \* ref3556-75-08-1.gnu
- \* ref3565-7727-37-9-ABC.gnu
- \* ref3566-7782-44-7-ABC.gnu
- \* ref3567-7440-37-1-ABC.gnu
- \* ref3568-124-38-9-ABC.gnu
- \* ref3569-74-82-8-ABC.gnu
- \* ref3569-75-71-8-ABC.gnu
- \* ref3569-75-72-9-ABC.gnu
- \* ref3569-75-73-0-ABC.gnu
- \* ref3571-56-23-5-ABC.gnu
- \* ref3573-74-83-9-ABC.gnu
- \* ref3578-HYHMYONEYJINON-UHFFFAOYSA-N.gnu
- \* ref3578-MHAJDPJQMAIIY-UHFFFAOYSA-N.gnu
- \* ref3578-QTGGFXPTAQEODO-UHFFFAOYSA-N.gnu
- \* ref3584-103-76-4.gnu
- \* ref3584-105-59-9.gnu
- \* ref3584-106-58-1.gnu
- \* ref3584-107-15-3.gnu

- \* ref3584-108-01-0.gnu
- \* ref3584-109-01-3.gnu
- \* ref3584-109-07-9.gnu
- \* ref3584-110-85-0.gnu
- \* ref3584-110-91-8.gnu
- \* ref3584-111-42-2.gnu
- \* ref3584-124-09-4.gnu
- \* ref3584-124-68-5.gnu
- \* ref3584-141-43-5.gnu
- \* ref3584-1704-62-7.gnu
- \* ref3584-6168-72-5.gnu
- \* ref3584-6291-84-5.gnu
- \* ref3584-6425-39-4.gnu
- \* ref3584-78-90-0.gnu
- \* ref3584-929-06-6.gnu
- \* ref3592-10028-15-6.gnu
- \* ref3593-10028-15-6.gnu
- \* ref3595-10028-15-6.gnu
- \* ref3596-10028-15-6.gnu
- \* ref3601-2551-62-4.gnu
- \* ref3601-74-82-8.gnu
- \* ref3601-74-84-0.gnu
- \* ref3601-7439-90-9.gnu
- \* ref3601-7440-37-1.gnu
- \* ref3601-75-73-0.gnu
- \* ref3601-7727-37-9.gnu
- \* ref3601-7782-44-7.gnu
- \* ref3603-7782-44-7-ABC.gnu
- \* ref3605-7782-44-7-ABC.gnu
- \* ref3606-7782-44-7-ABC.gnu
- \* ref3609-108-93-0.gnu
- \* ref3609-108-94-1.gnu
- \* ref3609-120-92-3.gnu
- \* ref3609-123-54-6.gnu
- \* ref3609-71-36-3.gnu
- \* ref3609-75-05-8.gnu
- \* ref3609-78-83-1.gnu
- \* ref3609-78-93-3.gnu
- \* ref3609-79-20-9.gnu
- \* ref3609-96-41-3.gnu
- \* ref3610-624-92-0.gnu
- \* ref3612-106-98-9-ABC.gnu
- \* ref3628-7782-44-7.gnu
- \* ref3632-107-87-9.gnu
- \* ref3632-108-10-1.gnu
- \* ref3632-563-80-4.gnu
- \* ref3632-565-61-7.gnu

- \* ref3632-565-69-5.gnu
- \* ref3632-589-38-8.gnu
- \* ref3632-591-78-6.gnu
- \* ref3632-75-97-8.gnu
- \* ref3632-96-22-0.gnu
- \* ref3638-106-70-7.gnu
- \* ref3638-107-87-9.gnu
- \* ref3638-110-43-0.gnu
- \* ref3638-110-62-3.gnu
- \* ref3638-111-27-3.gnu
- \* ref3638-111-70-6.gnu
- \* ref3638-123-38-6.gnu
- \* ref3638-123-72-8.gnu
- \* ref3638-554-12-1.gnu
- \* ref3638-591-78-6.gnu
- \* ref3638-623-42-7.gnu
- \* ref3638-624-24-8.gnu
- \* ref3638-67-64-1.gnu
- \* ref3638-71-23-8.gnu
- \* ref3638-71-36-3.gnu
- \* ref3638-71-41-0.gnu
- \* ref3638-78-93-3.gnu
- \* ref3638-79-20-9.gnu
- \* ref3640-123-86-4.gnu
- \* ref3640-67-64-1.gnu
- \* ref3641-79-20-9.gnu
- \* ref3648-109-99-9.gnu
- \* ref3648-64-17-5.gnu
- \* ref3648-67-56-1.gnu
- \* ref3654-105-59-9.gnu
- \* ref3654-141-43-5.gnu
- \* ref3654-6291-84-5.gnu
- \* ref3658-507-20-0.gnu
- \* ref3660-64-17-5.gnu
- \* ref3667-67-64-1.gnu
- \* ref3668-74-93-1.gnu
- \* ref3668-75-18-3.gnu
- \* ref3668-75-50-3.gnu
- \* ref3668-7664-41-7.gnu
- \* ref3668-7783-06-4.gnu
- \* ref3680-55-18-5.gnu
- \* ref3680-62-75-9.gnu
- \* ref3681-100-41-4-ABC.gnu
- \* ref3681-106-42-3-ABC.gnu
- \* ref3681-108-90-7-ABC.gnu
- \* ref3681-127-18-4-ABC.gnu
- \* ref3681-156-60-5-ABC.gnu

- \* ref3681-630-20-6-ABC.gnu
- \* ref3681-75-01-4-ABC.gnu
- \* ref3681-75-35-4-ABC.gnu
- \* ref3681-79-00-5-ABC.gnu
- \* ref3681-79-01-6-ABC.gnu
- \* ref3683-101-55-3.gnu
- \* ref3683-103173-66-6.gnu
- \* ref3683-1163-19-5.gnu
- \* ref3683-116995-32-5.gnu
- \* ref3683-116995-33-6.gnu
- \* ref3683-117948-63-7.gnu
- \* ref3683-117964-21-3.gnu
- \* ref3683-147217-71-8.gnu
- \* ref3683-147217-72-9.gnu
- \* ref3683-147217-73-0.gnu
- \* ref3683-147217-74-1.gnu
- \* ref3683-147217-75-2.gnu
- \* ref3683-147217-76-3.gnu
- \* ref3683-147217-77-4.gnu
- \* ref3683-147217-79-6.gnu
- \* ref3683-147217-80-9.gnu
- \* ref3683-147217-81-0.gnu
- \* ref3683-155999-95-4.gnu
- \* ref3683-171977-44-9.gnu
- \* ref3683-182346-21-0.gnu
- \* ref3683-182677-28-7.gnu
- \* ref3683-182677-30-1.gnu
- \* ref3683-189084-57-9.gnu
- \* ref3683-189084-58-0.gnu
- \* ref3683-189084-59-1.gnu
- \* ref3683-189084-60-4.gnu
- \* ref3683-189084-61-5.gnu
- \* ref3683-189084-62-6.gnu
- \* ref3683-189084-63-7.gnu
- \* ref3683-189084-64-8.gnu
- \* ref3683-189084-65-9.gnu
- \* ref3683-189084-66-0.gnu
- \* ref3683-189084-67-1.gnu
- \* ref3683-189084-68-2.gnu
- \* ref3683-2050-47-7.gnu
- \* ref3683-207122-15-4.gnu
- \* ref3683-207122-16-5.gnu
- \* ref3683-218304-36-0.gnu
- \* ref3683-243982-82-3.gnu
- \* ref3683-243982-83-4.gnu
- \* ref3683-259087-35-9.gnu
- \* ref3683-32536-52-0.gnu

- \* ref3683-327185-09-1.gnu
- \* ref3683-327185-11-5.gnu
- \* ref3683-327185-13-7.gnu
- \* ref3683-337513-53-8.gnu
- \* ref3683-337513-54-9.gnu
- \* ref3683-337513-55-0.gnu
- \* ref3683-337513-56-1.gnu
- \* ref3683-337513-66-3.gnu
- \* ref3683-337513-67-4.gnu
- \* ref3683-337513-68-5.gnu
- \* ref3683-337513-72-1.gnu
- \* ref3683-337513-75-4.gnu
- \* ref3683-337513-77-6.gnu
- \* ref3683-337513-82-3.gnu
- \* ref3683-35854-94-5.gnu
- \* ref3683-36563-47-0.gnu
- \* ref3683-366791-32-4.gnu
- \* ref3683-373594-78-6.gnu
- \* ref3683-38463-82-0.gnu
- \* ref3683-405237-85-6.gnu
- \* ref3683-405237-86-7.gnu
- \* ref3683-407578-53-4.gnu
- \* ref3683-407606-55-7.gnu
- \* ref3683-407606-57-9.gnu
- \* ref3683-407606-59-1.gnu
- \* ref3683-407606-61-5.gnu
- \* ref3683-41318-75-6.gnu
- \* ref3683-417727-71-0.gnu
- \* ref3683-437701-78-5.gnu
- \* ref3683-437701-79-6.gnu
- \* ref3683-442690-45-1.gnu
- \* ref3683-446254-14-4.gnu
- \* ref3683-446254-15-5.gnu
- \* ref3683-446254-16-6.gnu
- \* ref3683-446254-17-7.gnu
- \* ref3683-446254-18-8.gnu
- \* ref3683-446254-19-9.gnu
- \* ref3683-446254-20-2.gnu
- \* ref3683-446254-21-3.gnu
- \* ref3683-446254-22-4.gnu
- \* ref3683-446254-23-5.gnu
- \* ref3683-446254-24-6.gnu
- \* ref3683-446254-25-7.gnu
- \* ref3683-446254-26-8.gnu
- \* ref3683-446254-27-9.gnu
- \* ref3683-446254-28-0.gnu
- \* ref3683-446254-29-1.gnu

- \* ref3683-446254-30-4.gnu
- \* ref3683-446254-31-5.gnu
- \* ref3683-446254-32-6.gnu
- \* ref3683-446254-33-7.gnu
- \* ref3683-446254-34-8.gnu
- \* ref3683-446254-35-9.gnu
- \* ref3683-446254-36-0.gnu
- \* ref3683-446254-37-1.gnu
- \* ref3683-446254-38-2.gnu
- \* ref3683-446254-39-3.gnu
- \* ref3683-446254-40-6.gnu
- \* ref3683-446254-41-7.gnu
- \* ref3683-446254-42-8.gnu
- \* ref3683-446254-43-9.gnu
- \* ref3683-446254-45-1.gnu
- \* ref3683-446254-48-4.gnu
- \* ref3683-446254-50-8.gnu
- \* ref3683-446254-51-9.gnu
- \* ref3683-446254-52-0.gnu
- \* ref3683-446254-53-1.gnu
- \* ref3683-446254-54-2.gnu
- \* ref3683-446254-55-3.gnu
- \* ref3683-446254-56-4.gnu
- \* ref3683-446254-57-5.gnu
- \* ref3683-446254-58-6.gnu
- \* ref3683-446254-59-7.gnu
- \* ref3683-446254-60-0.gnu
- \* ref3683-446254-61-1.gnu
- \* ref3683-446254-62-2.gnu
- \* ref3683-446254-63-3.gnu
- \* ref3683-446254-64-4.gnu
- \* ref3683-446254-65-5.gnu
- \* ref3683-446254-66-6.gnu
- \* ref3683-446254-67-7.gnu
- \* ref3683-446254-68-8.gnu
- \* ref3683-446254-69-9.gnu
- \* ref3683-446254-70-2.gnu
- \* ref3683-446254-71-3.gnu
- \* ref3683-446254-72-4.gnu
- \* ref3683-446254-73-5.gnu
- \* ref3683-446254-74-6.gnu
- \* ref3683-446254-75-7.gnu
- \* ref3683-446254-76-8.gnu
- \* ref3683-446254-77-9.gnu
- \* ref3683-446254-78-0.gnu
- \* ref3683-446254-79-1.gnu
- \* ref3683-446254-80-4.gnu

- \* ref3683-446254-81-5.gnu
- \* ref3683-446254-82-6.gnu
- \* ref3683-446254-83-7.gnu
- \* ref3683-446254-84-8.gnu
- \* ref3683-446254-85-9.gnu
- \* ref3683-446254-86-0.gnu
- \* ref3683-446254-87-1.gnu
- \* ref3683-446254-88-2.gnu
- \* ref3683-446254-89-3.gnu
- \* ref3683-446254-90-6.gnu
- \* ref3683-446254-91-7.gnu
- \* ref3683-446254-92-8.gnu
- \* ref3683-446254-93-9.gnu
- \* ref3683-446254-94-0.gnu
- \* ref3683-446254-95-1.gnu
- \* ref3683-446254-97-3.gnu
- \* ref3683-446254-98-4.gnu
- \* ref3683-446254-99-5.gnu
- \* ref3683-446255-00-1.gnu
- \* ref3683-446255-01-2.gnu
- \* ref3683-446255-02-3.gnu
- \* ref3683-446255-03-4.gnu
- \* ref3683-446255-04-5.gnu
- \* ref3683-446255-05-6.gnu
- \* ref3683-446255-06-7.gnu
- \* ref3683-446255-07-8.gnu
- \* ref3683-446255-08-9.gnu
- \* ref3683-446255-09-0.gnu
- \* ref3683-446255-10-3.gnu
- \* ref3683-446255-11-4.gnu
- \* ref3683-446255-12-5.gnu
- \* ref3683-446255-13-6.gnu
- \* ref3683-446255-14-7.gnu
- \* ref3683-446255-15-8.gnu
- \* ref3683-446255-16-9.gnu
- \* ref3683-446255-17-0.gnu
- \* ref3683-446255-18-1.gnu
- \* ref3683-446255-19-2.gnu
- \* ref3683-446255-20-5.gnu
- \* ref3683-446255-21-6.gnu
- \* ref3683-446255-23-8.gnu
- \* ref3683-446255-24-9.gnu
- \* ref3683-446255-25-0.gnu
- \* ref3683-446255-26-1.gnu
- \* ref3683-446255-27-2.gnu
- \* ref3683-446255-28-3.gnu
- \* ref3683-446255-30-7.gnu



- \* ref3683-446255-34-1.gnu
- \* ref3683-446255-38-5.gnu
- \* ref3683-446255-39-6.gnu
- \* ref3683-446255-42-1.gnu
- \* ref3683-446255-43-2.gnu
- \* ref3683-446255-46-5.gnu
- \* ref3683-446255-50-1.gnu
- \* ref3683-446255-54-5.gnu
- \* ref3683-446255-56-7.gnu
- \* ref3683-46438-88-4.gnu
- \* ref3683-49690-94-0.gnu
- \* ref3683-51452-87-0.gnu
- \* ref3683-51930-04-2.gnu
- \* ref3683-53551-87-4.gnu
- \* ref3683-5436-43-1.gnu
- \* ref3683-60348-60-9.gnu
- \* ref3683-6255-22-7.gnu
- \* ref3683-63387-28-0.gnu
- \* ref3683-65075-08-3.gnu
- \* ref3683-67797-09-5.gnu
- \* ref3683-68631-49-2.gnu
- \* ref3683-6876-00-2.gnu
- \* ref3683-6903-63-5.gnu
- \* ref3683-83694-71-7.gnu
- \* ref3683-93703-48-1.gnu
- \* ref3685-107-10-8.gnu
- \* ref3685-107-11-9.gnu
- \* ref3685-109-02-4.gnu
- \* ref3685-142-84-7.gnu
- \* ref3685-75-50-3.gnu
- \* ref3686-121-44-8.gnu
- \* ref3690-56-23-5.gnu
- \* ref3690-67-66-3.gnu
- \* ref3690-74-82-8.gnu
- \* ref3690-75-09-2.gnu
- \* ref3691-108-20-3.gnu
- \* ref3691-142-96-1.gnu
- \* ref3691-1634-04-4.gnu
- \* ref3691-637-92-3.gnu
- \* ref3691-764-47-6.gnu
- \* ref3691-994-05-8.gnu
- \* ref3692-127-18-4-ABC.gnu
- \* ref3692-79-01-6-ABC.gnu
- \* ref3693-108-20-3.gnu
- \* ref3693-1634-04-4.gnu
- \* ref3693-333-36-8.gnu
- \* ref3693-60-29-7.gnu

- \* ref3693-64-17-5.gnu
- \* ref3693-67-56-1.gnu
- \* ref3693-67-63-0.gnu
- \* ref3693-71-23-8.gnu
- \* ref3694-106-42-3.gnu
- \* ref3694-108-88-3.gnu
- \* ref3694-67-56-1.gnu
- \* ref3694-67-63-0.gnu
- \* ref3697-60-29-7.gnu
- \* ref3701-10024-97-2-gordon1895.gnu
- \* ref3701-10024-97-2.gnu
- \* ref3704-10024-97-2.gnu
- \* ref3707-7727-37-9.gnu
- \* ref3708-10024-97-2.gnu
- \* ref3709-10024-97-2.gnu
- \* ref3709-124-38-9.gnu
- \* ref3710-10024-97-2.gnu
- \* ref3710-75-19-4.gnu
- \* ref3711-10024-97-2.gnu
- \* ref3711-124-38-9.gnu
- \* ref3711-1333-74-0.gnu
- \* ref3711-7782-44-7.gnu
- \* ref3712-1333-74-0.gnu
- \* ref3712-7782-44-7.gnu
- \* ref3713-1333-74-0.gnu
- \* ref3713-7727-37-9.gnu
- \* ref3713-7782-44-7.gnu
- \* ref3714-7439-90-9-series\_1.gnu
- \* ref3714-7439-90-9-series\_2.gnu
- \* ref3714-7440-01-9.gnu
- \* ref3714-7440-37-1.gnu
- \* ref3714-7440-59-7.gnu
- \* ref3714-7440-63-3.gnu
- \* ref3716-7727-37-9.gnu
- \* ref3716-7782-44-7.gnu
- \* ref3717-124-38-9.gnu
- \* ref3717-1333-74-0.gnu
- \* ref3717-630-08-0.gnu
- \* ref3717-7727-37-9.gnu
- \* ref3718-463-58-1.gnu
- \* ref3718-7783-06-4.gnu
- \* ref3719-104-76-7.gnu
- \* ref3719-106-68-3.gnu
- \* ref3719-111-87-5.gnu
- \* ref3719-3391-86-4.gnu
- \* ref3719-589-98-0.gnu
- \* ref3719-71-36-3.gnu

- \* ref3719-87-40-1.gnu
- \* ref3724-104-87-0.gnu
- \* ref3724-108-95-2.gnu
- \* ref3724-118-93-4.gnu
- \* ref3724-122-00-9.gnu
- \* ref3724-123-11-5.gnu
- \* ref3724-135-02-4.gnu
- \* ref3724-529-20-4.gnu
- \* ref3724-577-16-2.gnu
- \* ref3724-579-74-8.gnu
- \* ref3724-585-74-0.gnu
- \* ref3724-586-37-8.gnu
- \* ref3724-591-31-1.gnu
- \* ref3724-620-23-5.gnu
- \* ref3724-90-02-8.gnu
- \* ref3724-93-55-0.gnu
- \* ref3724-98-86-2.gnu
- \* ref3726-NMNZVYLGOWCHOD-UHFFFAOYSA-N.gnu
- \* ref3734-106-97-8.gnu
- \* ref3734-74-82-8.gnu
- \* ref3734-74-84-0.gnu
- \* ref3734-74-98-6.gnu
- \* ref3748-74-86-2.gnu
- \* ref3751-74-86-2.gnu
- \* ref3769-2278-22-0.gnu
- \* ref3769-5796-89-4.gnu
- \* ref3776-104-87-0.gnu
- \* ref3776-110-93-0.gnu
- \* ref3776-431-03-8.gnu
- \* ref3776-5392-40-5.gnu
- \* ref3776-600-14-6.gnu
- \* ref3776-620-23-5.gnu
- \* ref3777-1333-74-0.gnu
- \* ref3777-630-08-0.gnu
- \* ref3781-1333-74-0-ABC.gnu
- \* ref3782-1333-74-0-ABC.gnu
- \* ref3783-106-97-8-ABC.gnu
- \* ref3783-124-38-9-ABC.gnu
- \* ref3783-1333-74-0-ABC.gnu
- \* ref3783-74-82-8-ABC.gnu
- \* ref3783-74-84-0-ABC.gnu
- \* ref3783-74-85-1-ABC.gnu
- \* ref3783-74-98-6-ABC.gnu
- \* ref3783-7727-37-9-ABC.gnu
- \* ref3783-7782-44-7-ABC.gnu
- \* ref3785-463-82-1-ABC.gnu
- \* ref3785-74-82-8-ABC.gnu

- \* ref3785-7440-37-1-ABC.gnu
- \* ref3785-7782-44-7-ABC.gnu
- \* ref3788-123-51-3.gnu
- \* ref3788-123-92-2.gnu
- \* ref3788-141-78-6.gnu
- \* ref3789-7440-01-9-ABC.gnu
- \* ref3789-7440-37-1-ABC.gnu
- \* ref3789-7440-59-7-ABC.gnu
- \* ref3794-92-52-4.gnu
- \* ref3795-1333-74-0-ABC.gnu
- \* ref3795-7727-37-9-ABC.gnu
- \* ref3799-106-97-8.gnu
- \* ref3799-463-82-1.gnu
- \* ref3799-74-82-8.gnu
- \* ref3799-74-84-0.gnu
- \* ref3799-74-98-6.gnu
- \* ref3799-75-28-5.gnu
- \* ref3799-83-34-1.gnu
- \* ref3801-2551-62-4.gnu
- \* ref3801-7440-37-1.gnu
- \* ref3806-10036-47-2-ABC.gnu
- \* ref3806-7783-54-2-ABC.gnu
- \* ref3808-7783-07-5-ABC.gnu
- \* ref3809-7790-92-3.gnu
- \* ref3917-13536-94-2-ABC.gnu
- \* ref3917-7783-06-4-ABC.gnu
- \* ref3926-7782-39-0-ABC.gnu
- \* ref3933-7446-09-5-ABC.gnu
- \* ref3933-7783-06-4-ABC.gnu
- \* ref3937-7782-50-5-ABC.gnu
- \* ref3938-7782-50-5.gnu
- \* ref3939-25291-17-2.gnu
- \* ref3939-27619-97-2.gnu
- \* ref3939-355-43-1.gnu
- \* ref3939-647-42-7.gnu
- \* ref3944-10024-97-2-ABC.gnu
- \* ref3947-51218-45-2.gnu
- \* ref3956-10049-04-4.gnu
- \* ref3957-7790-92-3.gnu
- \* ref3965-10049-04-4.gnu
- \* ref3967-10049-04-4.gnu
- \* ref3969-10049-04-4.gnu
- \* ref4017-7782-79-8.gnu
- \* refthis-7791-21-1-ABC.gnu
- \* refthis-7791-21-1.gnu

- sfmakedepend

- util

- Tdep\_ABC.py
- chem\_to\_calch.py
- get\_info\_from\_casrn.py
- get\_pics\_from\_inchikeys.py
- henry\_avatar.py
- henry\_util.py
- parse\_henry\_f90.py
- ref0190.py
- ref0379.py
- ref2440.py
- ref2546.py
- ref3406.py
- ref3409.py
- ref3579-dict.py
- ref3579.py
- ref3586.py
- ref3636.py
- ref3641.py
- ref3654.py
- ref3659.py
- ref3662.py
- ref3667.py
- ref3681.py
- ref3765.py
- ref3807.py
- ref3809.py
- ref3810.py
- ref3857.py
- ref3934.py
- ref3937.py
- ref3938.py
- rename\_casrn\_png.py
- rstools.py

The copyright of individual parts of the supplement might differ from the article licence.
